# Supplementary material for: Clinical Behavior, Mutational Profile and T-Cell Repertoire of High-Grade Neuroendocrine Tumors of the Head and Neck
Source: MDPI journal article supplement (doi:10.3390/cancers15092431), 2023-04-24
Supplement: s1 [file s1]

**Supplementary Table S3.** Association of survival with clinical characteristics.

|                                                  | Association  |              |
|--------------------------------------------------|--------------|--------------|
|                                                  | OS since IDx | OS since R/M |
| <b>Sex (Male vs Female)</b>                      | P=0.105      | P=0.445      |
| <b>Smoking (Yes vs No)</b>                       | P=0.319      | P=0.445      |
| <b>Primary tumor (PNS vs SG vs OP vs Larynx)</b> | P=0.463      | P=0.129      |
| <b>Stage IDx (II vs IVA vs IVB vs IVC)</b>       | P=0.387      | P=0.438      |
| <b>Ki67 (&lt; 90 vs ≥90)</b>                     | P=0.356      | P=0.246      |
| <b>Chromogranin (positive vs negative)</b>       | P=0.193      | P=0.808      |
| <b>Synaptophysin (positive vs negative)</b>      | P=0.157      | P=0.445      |
| <b>Neuronal specific enolase</b>                 | P=0.480      | P=0.317      |

IDx: initial diagnosis, P= p-value, PNS: paranasal sinus, R/M: recurrent/metastatic, SG: salivary gland, OP: oropharynx
